# Supplementary material
Source: MDPI journal article supplement (https://www.mdpi.com/2073-4395/5/3/418)
Supplement: s1 [file s1]

Supplementary Materials


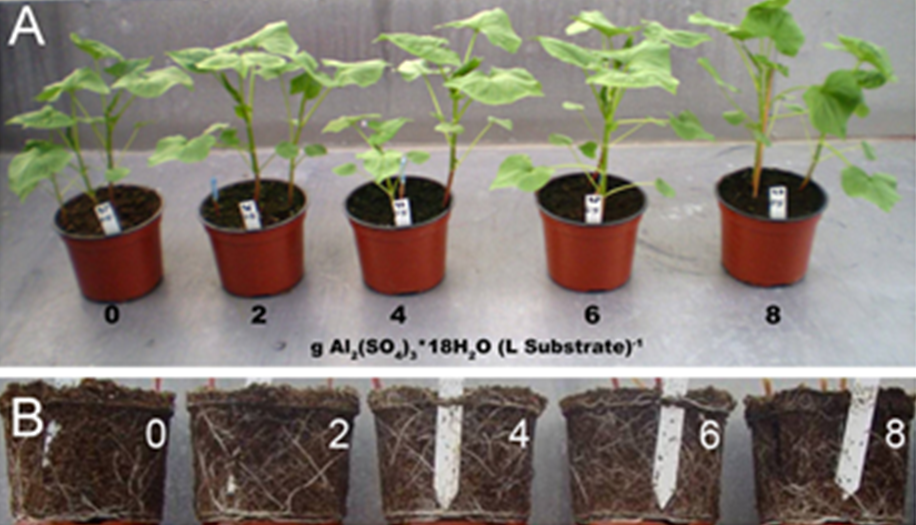


**Figure S1.** Vegetative shoot growth (**A**) and root growth (**B**) of buckwheat cultivar “Lifago” as affected by increasing Al2(SO4)3*18H2O application (0–8 g) to 1 L substrate four weeks after germination.


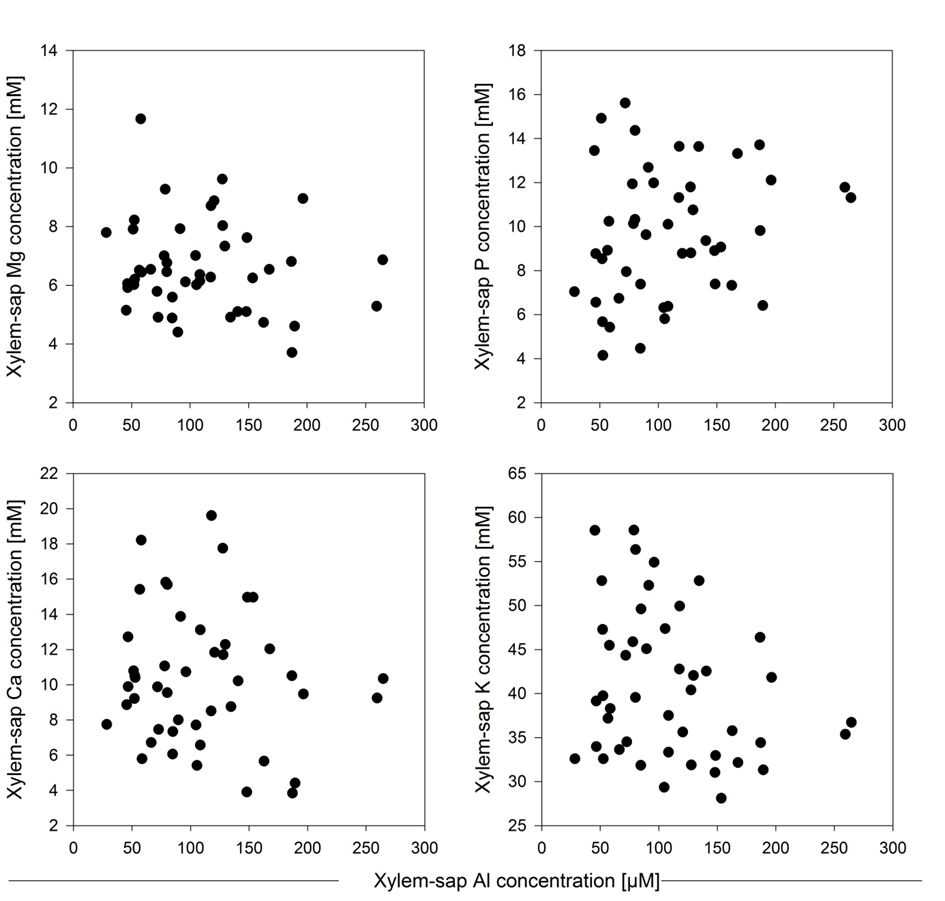


**Figure S2.** Relationships between xylem-sap Al concentrations and the xylem-sap Mg, P, K and Ca concentrations of 46 genotypes of the genus *Fagopyrum*. Cultivation of the plants for three weeks in substrate with an Al supply of 8 g Al2(SO4)3*18H2O. Xylem sap was collected for 30 min after cutting off the shoots. Points represent means ± SE, *n* = 3.


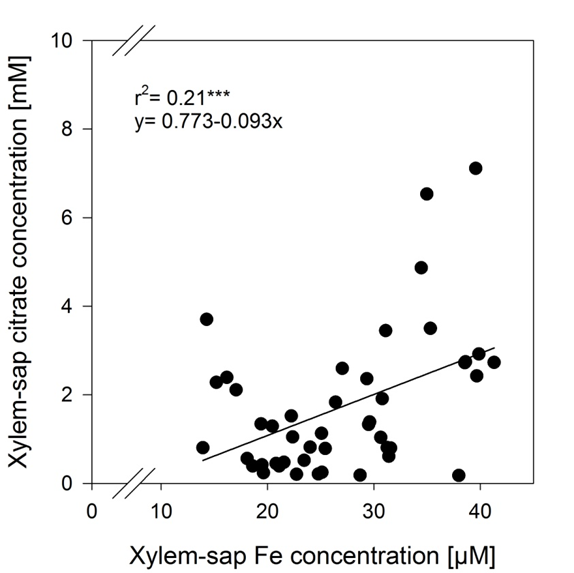


**Figure S3.** Correlations between xylem-sap Fe concentrations and the xylem-sap citrate concentrations of 46 genotypes of the genus *Fagopyrum*. Cultivation of the plants for
3 weeks in substrate with an Al supply of 8 g Al2(SO4)3*18H2O. Xylem sap was collected for 30 min after cutting off the shoots. Points represent means ± SE, *n* = 3.

**Table S1.** List of screened *Fagopyrum* genotypes. Genotypes belonging not to *F. esculentum* in bold. Species Run ID represents the number used in the graphs. The FAG accession code, the species specification, cultivar name and origin are as provided by the Gene Bank of the Leibniz Institute of Plant Genetics and Crop Plant Research (IPK, Gatersleben, Germany). https://gbis.ipk-gatersleben.de/GBIS_I/ergebnisliste.jsf;jsessionid=Nm7vVljVtvzWB1tJZ
LK3x1vM1GJLW1tmRnfTh5YhGJyP9LxJlYD8!-46513717!1432724277353).

| **Run ID** | **FAG** | **Species** | **Cultivar name** | **Origin** |
| --- | --- | --- | --- | --- |
| 1 | 21 | ***Fagopyrum tataricum*** (L.) Gaertn. |  |  |
| 2 | 26 | ***Fagopyrum tataricum*** (L.) Gaertn. | Welsford |  |
| 3 | 27 | ***Fagopyrum tataricum*** (L.) Gaertn. |  |  |
| 4 | 29 | *Fagopyrum esculentum* Moench var. esculentum | Amurskaja | Russia |
| 5 | 30 | *Fagopyrum esculentum* Moench var. esculentum | Bogatyr | Russia |
| 6 | 31 | *Fagopyrum esculentum* Moench var. esculentum | Belokatajskaja Mestnaja | Russia |
| 7 | 33 | *Fagopyrum esculentum* Moench var. esculentum | Tarskaja Mestnaja | Russia |
| 8 | 35 | *Fagopyrum esculentum* Moench var. esculentum | Amurskaja Mestnaja | Russia |
| 9 | 38 | *Fagopyrum esculentum* Moench var. esculentum | Kazanska | Russia |
| 10 | 41 | *Fagopyrum esculentum* Moench var. esculentum | Bogatyr | Russia |
| 11 | 44 | *Fagopyrum esculentum* Moench var. esculentum | Kalininskaja | Russia |
| 12 | 45 | *Fagopyrum esculentum* Moench var. esculentum | Belorusskaja | Belarus |
| 13 | 46 | *Fagopyrum esculentum* Moench var. esculentum | Satilovskaja 4 | Russia |
| 14 | 47 | *Fagopyrum esculentum* Moench var. esculentum | Amurskaja Mestnaja | Russia |
| 15 | 48 | ***Fagopyrum tataricum*** (L.) Gaertn. |  | Belarus |
| 16 | 49 | ***Fagopyrum tataricum*** (L.) Gaertn. |  |  |
| 17 | 50 | ***Fagopyrum tataricum*** (L.) Gaertn. |  | China |
| 18 | 66 | *Fagopyrum esculentum* Moench var. esculentum |  | China |

**Table S1.** *Cont.*

| **Run ID** | **FAG** | **Species** | **Cultivar name** | **Origin** |
| --- | --- | --- | --- | --- |
| 19 | 67 | *Fagopyrum esculentum* Moench var. esculentum |  | China |
| 20 | 68 | *Fagopyrum esculentum* Moench var. esculentum |  | China |
| 21 | 69 | *Fagopyrum esculentum* Moench var. esculentum |  | China |
| 22 | 70 | *Fagopyrum esculentum* Moench var. esculentum |  | China |
| 23 | 72 | *Fagopyrum esculentum* Moench var. esculentum | Serebristaja | Russia |
| 24 | 73 | *Fagopyrum esculentum* Moench var. esculentum | Alexsandrovskaja | Russia |
| 25 | 74 | *Fagopyrum esculentum* Moench var. esculentum | Burjatskaja | Russia |
| 26 | 75 | *Fagopyrum esculentum* Moench var. esculentum | Bogatyr | Russia |
| 27 | 76 | *Fagopyrum esculentum* Moench var. esculentum | Satilovskaja 4 | Russia |
| 28 | 77 | *Fagopyrum esculentum* Moench var. esculentum | Slavjanka | Russia |
| 29 | 78 | *Fagopyrum esculentum* Moench var. esculentum | Odesskaja | Russia |
| 30 | 79 | *Fagopyrum esculentum* Moench var. esculentum | Kalininskaja | Russia |
| 31 | 82 | *Fagopyrum esculentum* Moench var. Emarginatum (Roth) Alef. |  | China |
| 32 | 83 | *Fagopyrum esculentum* Moench var. Emarginatum (Roth) Alef. |  |  |
| 33 | 84 | *Fagopyrum esculentum* Moench var. Emarginatum (Roth) Alef. | Krasnoufimskaja 216 | Russia |
| 34 | 85 | *Fagopyrum esculentum* Moench var. Emarginatum (Roth) Alef. |  |  |
| 35 | 87 | *Fagopyrum esculentum* Moench var. esculentum | Tokinskaja 356 | Russia |
| 36 | 88 | *Fagopyrum esculentum* Moench var. esculentum |  | Deutschland |
| 37 | 89 | *Fagopyrum esculentum* Moench var. esculentum |  | Deutschland |
| 38 | 90 | *Fagopyrum esculentum* Moench var. esculentum |  | Iran |
| 39 | 92 | *Fagopyrum esculentum* Moench var. esculentum |  | CSFR |
| 40 | 93 | *Fagopyrum esculentum* Moench var. esculentum |  | CSFR |
| 41 | 94 | *Fagopyrum esculentum* Moench var. esculentum |  | Rußland |
| 42 | 95 | *Fagopyrum esculentum* Moench var. esculentum | Bogatyr | Rußland |
| 43 | 98 | ***Fagopyrum tataricum*** (L.) Gaertn. |  | Slowakia |
| 44 | 99 | ***Fagopyrum tataricum*** (L.) Gaertn. |  | China |
| 45 | 100 | ***Fagopyrum tataricum*** (L.) Gaertn. |  | Belarus |
| 46 | 102 | *Fagopyrum esculentum* Moench var. esculentum |  | Poland |
| 47 | 103 | *Fagopyrum esculentum* Moench var. esculentum |  | Poland |
| 48 | 104 | *Fagopyrum esculentum* Moench var. esculentum | Chruszowska | Poland |
| 49 | 105 | *Fagopyrum esculentum* Moench var. esculentum |  | Slowakia |
| 50 | 106 | *Fagopyrum esculentum* Moench var. esculentum |  | Slowakia |
| 51 | 107 | *Fagopyrum esculentum* Moench var. esculentum |  | Slowakia |
| 52 | 108 | *Fagopyrum esculentum* Moench var. esculentum |  | Slowakia |
| 53 | 109 | *Fagopyrum esculentum* Moench var. esculentum |  | Slovakia |
| 54 | 110 | *Fagopyrum esculentum* Moench var. esculentum |  | Slovakia |
| 55 | 111 | ***Fagopyrum tataricum*** (L.) Gaertn. Subsp. tataricum |  | Slovakia |
| 56 | 112 | ***Fagopyrum tataricum*** (L.) Gaertn. Subsp. tataricum |  | Slovakia |

**Table S1.** *Cont.*

| **Run ID** | **FAG** | **Species** | **Cultivar name** | **Origin** |
| --- | --- | --- | --- | --- |
| 57 | 113 | ***Fagopyrum tataricum*** (L.) Gaertn. Subsp. tataricum |  | Slovakia |
| 58 | 114 | *Fagopyrum esculentum* Moench var. esculentum |  | Slovakia |
| 59 | 115 | *Fagopyrum esculentum* Moench var. esculentum |  | Slovakia |
| 60 | 116 | *Fagopyrum esculentum* Moench var. esculentum |  | Germany |
| 61 | 117 | *Fagopyrum esculentum* Moench var. esculentum |  | Slovakia |
| 62 | 118 | *Fagopyrum esculentum* Moench var. esculentum |  | Slovakia |
| 63 | 120 | *Fagopyrum esculentum* Moench var. esculentum |  | Slovakia |
| 64 | 121 | *Fagopyrum esculentum* Moench var. esculentum |  | Slovakia |
| 65 | 122 | *Fagopyrum esculentum* Moench var. esculentum |  | Slovakia |
| 66 | 123 | *Fagopyrum esculentum* Moench var. esculentum |  | Slovakia |
| 67 | 124 | *Fagopyrum esculentum* Moench var. esculentum |  | Slovakia |
| 68 | 125 | *Fagopyrum esculentum* Moench var. esculentum |  | Slovakia |
| 69 | 126 | *Fagopyrum esculentum* Moench var. esculentum |  | Slovakia |
| 70 | 127 | *Fagopyrum esculentum* Moench var. esculentum |  | Slovakia |
| 71 | 128 | *Fagopyrum esculentum* Moench var. esculentum |  | Poland |
| 72 | 129 | *Fagopyrum esculentum* Moench var. esculentum |  | Korea |
| 73 | 130 | *Fagopyrum esculentum* Moench var. esculentum |  | Korea |
| 74 | 131 | *Fagopyrum esculentum* Moench var. esculentum | Steirischer | Austria |
| 75 | 132 | *Fagopyrum esculentum* Moench var. esculentum |  | Korea |
| 76 | 133 | *Fagopyrum esculentum* Moench var. esculentum |  | Korea |
| 77 | 134 | *Fagopyrum esculentum* Moench var. esculentum |  | Korea |
| 78 | 135 | ***Fagopyrum acutatum*** (Lehm.) Mansf. ex Hammer |  | nn |
| 79 | 136 | *Fagopyrum esculentum* Moench var. esculentum |  | Korea |
| 80 | 137 | *Fagopyrum esculentum* Moench var. esculentum | grano sarceno | Italy |
| 81 | 138 | *Fagopyrum esculentum* Moench var. esculentum | grano sarceno | Italy |
| 82 | 139 | *Fagopyrum esculentum* Moench var. Emarginatum (Roth) Alef. | grano sarceno | Italy |
| 83 | 140 | *Fagopyrum esculentum* Moenchvar. esculentum |  | Italy |
| 84 | 141 | *Fagopyrum esculentum* Moenchvar. esculentum |  | Italy |
| 85 | 143 | ***Fagopyrum tataricum*** (L.) Gaertn. |  | Italy |
| 86 | 144 | *Fagopyrum esculentum* Moench var. esculentum |  | Italy |
| 87 | 145 | *Fagopyrum esculentum* Moench var. esculentum |  | Austria |
| 88 | 148 | *Fagopyrum esculentum* Moench var. esculentum |  | China |
| 89 | 153 | *Fagopyrum esculentum* Moench | Alex | Germany |
| 90 | 155 | *Fagopyrum esculentum* Moench |  | Hungary |
| 91 | 156 | *Fagopyrum esculentum* Moench | Aral | Netherlands |
| 92 | 158 | *Fagopyrum esculentum* Moench | Empire | Netherlands |
| 93 | 159 | *Fagopyrum esculentum* Moench | Skorospelaja 81 | Russia |
| 94 | 160 | *Fagopyrum esculentum* Moench |  | Hungary |

© 2015 by the authors; licensee MDPI, Basel, Switzerland. This article is an open access article distributed under the terms and conditions of the Creative Commons Attribution license (http://creativecommons.org/licenses/by/4.0/).
